# Supplementary material
Source: publisher site journal article supplement (https://www.dovepress.com/article/402133)
Supplement: Supplementary file 1 [file get_supplementary_file.php]

**Supplementary Table 1.** Questionnaire of three influencing factors.

| Classification of the factors | | Questions |
| --- | --- | --- |
| Predisposing factors | Knowledge | Q1 Do you know the types of allergic reactions that can be predicted by the skin test? |
| Q2 Which one of the following narrations could be used to identify that the result of the skin test is “positive”? |
| Q3 What is the priority drug for the rescue of the allergic shock of cephalosporin? |
| Q4 Among the drug directory of cephalosporins that are currently used by our hospital, the package inserts of some of the cephalosporins clearly state that a skin test is required. What are they? |
| Q5 If a patient was once diagnosed with a “positive” skin test of a certain type of cephalosporin, this diagnosis should be included in the allergic history, and that type of cephalosporin should not be applied to him/her in the future. Is it right? |
| Attitude | Q6 Do you agree that the routine cephalosporin skin test should be abolished? |
| Q7 Are you going to give up prescribing cephalosporin to the patients as a preference of treatment because of the need for skin tests in advance? |
| Q8 Do you ask your patients in detail whether they have an allergic history of cephalosporin? |
| Q9 Are you worried that: If the routine cephalosporin skin test is abolished, you will have to shoulder more responsibilities when medical disputes arise? |
| Enabling factors | Attitude | Q10 If it is recommended in nation-level policies that the routine cephalosporin skin test should be abolished, will you agree with it? |
| Q11 If it has been decided by the medical institutions at higher levels that the routine cephalosporin skin test should be abolished, will you agree with it? |
| Q12 If it is recommended by professional academic bodies that the routine cephalosporin skin test should be abolished, will you agree with it? |
| Q13 If it is recommended by the hospital that the routine cephalosporin skin test should be abolished, will you agree with it? |
| Reinforcing factors | Practice | Q14 If it is recommended that the routine cephalosporin skin test should be abolished in any promotion association or training program sponsored by the health administrative authorities, will you agree with it? |
| Q15 If it is recommended by medical experts from institutions at higher levels that the routine cephalosporin skin test should be abolished, will you agree with it? |
| Q16 If your colleagues and peers no longer prescribe the routine cephalosporin skin test to the patients, will you follow their examples? |
| Q17 Will your decisions on prescribing the routine cephalosporin skin test for the patients be influenced by the content of professional medical journals and/or media propaganda? |
| Anticipated behavior | | Q18 Are skin tests routinely done before cephalosporins are used? |

The final questionnaire questions were formulated after experts conducted the tests and pre-surveys.
